# Supplementary material
Source: Springer Nature journal article supplement (https://www.springermedizin.de/resource/supplementary/12913_2013_2898_MOESM1_ESM.pdf/9531798)
Supplement: MOESM1 [file 9531798]

VBSC phlebotomists (n=273) working in PHCs of VLL and LVN answered a questionnaire in 2007.

Of VLL 147, n=13 registered were on leave and n=16 registered retired.

Of LVN n=126, n=16 registered were on leave and n=15 registered retired.

Invited phlebotomists to the IG (n=118).

Invited phlebotomists to the CG (n=95).

n=34 declined participation.

n=16 declined participation.

Final IG (n=84).

Final CG (n=79).
